# Supplementary material for: Cu(HCO2)2L {L = pyrazine, 4,4′-bipyridine}: employing the formate anion as a building block in three-dimensional coordination polymers
Source: Royal Society of Chemistry journal article supplement (doi:10.1039/b302631k), 2003-01-01
Supplement: b302631k.pdf [file b302631k.pdf]

**Table S1.** Exponents  $\zeta_i$  and valence shell ionization potentials  $H_{ii}$  of Slater-type orbitals  $\chi_i$  used for extended Hückel tight-binding calculation <sup>a</sup>

| atom | $\chi_i$ | $H_{ii}$ (eV) | $\zeta_i$ | $C_i$ <sup>b</sup> | $\zeta'_i$ | $C'_i$ <sup>b</sup> |
|------|----------|---------------|-----------|--------------------|------------|---------------------|
| Cu   | 4s       | -11.4         | 2.151     | 1.0                |            |                     |
| Cu   | 4p       | -6.06         | 1.370     | 1.0                |            |                     |
| Cu   | 3d       | -14.0         | 7.025     | 0.4473             | 3.004      | 0.6978              |
| O    | 2s       | -32.3         | 2.688     | 0.7076             | 1.675      | 0.3745              |
| O    | 2p       | -14.8         | 3.694     | 0.3322             | 1.659      | 0.7448              |
| N    | 2s       | -26.0         | 2.261     | 0.7297             | 1.425      | 0.3455              |
| N    | 2p       | -13.4         | 3.249     | 0.2881             | 1.499      | 0.7783              |
| C    | 2s       | -21.4         | 1.831     | 0.7931             | 1.153      | 0.2739              |
| C    | 2p       | -11.4         | 2.730     | 0.2595             | 1.257      | 0.8026              |
| H    | 1s       | -13.6         | 1.300     | 1.0                |            |                     |

<sup>a</sup>  $H_{ii}$ 's are the diagonal matrix elements  $\langle \chi_i | H^{\text{eff}} | \chi_i \rangle$ , where  $H^{\text{eff}}$  is the effective Hamiltonian. In our calculations of the off-diagonal matrix elements  $H_{ij} = \langle \chi_i | H^{\text{eff}} | \chi_j \rangle$ , the weighted formula was used. See: Ammeter, J.; Bürgi, H.-B.; Thibeault, J.; Hoffmann, R., *J. Am. Chem. Soc.* **1978**, *100*, 3686.

<sup>b</sup> Coefficients used in the double-zeta Slater-type orbital expansion.
